# Supplementary material for: Performance evaluation of the Alphasense OPC-N3 and Plantower PMS5003 sensor in measuring dust events in the Salt Lake Valley, Utah
Source: Copernicus journal article supplement (doi:10.5194/amt-2022-292), 2022-12-02
Supplement: Supplementary file 1 [file amt-2022-292-supplement.pdf]

# Supplementary material: Performance evaluation of the Alphasense OPC-N3 and Plantower PMS5003 sensor in measuring dust events in the Salt Lake Valley, Utah

## Section S1: Multilinear regression

A multilinear regression was performed with FEM-HW PM<sub>10</sub> as the dependent variable and OPC-HW, and relative humidity (RH) as independent variables.

Without considering the effect of the RH:

|                             | Intercept<br>Coefficient<br>( $\mu\text{g}/\text{m}^3$ ) | Intercept<br>Standard<br>Error<br>( $\mu\text{g}/\text{m}^3$ ) | PM <sub>10</sub> OPC-<br>HW<br>MLR<br>Coefficient | PM <sub>10</sub> OPC-<br>HW Standard<br>Error | R <sup>2</sup> | Adjusted R <sup>2</sup> | RMSE<br>( $\mu\text{g}/\text{m}^3$ ) |
|-----------------------------|----------------------------------------------------------|----------------------------------------------------------------|---------------------------------------------------|-----------------------------------------------|----------------|-------------------------|--------------------------------------|
| PM <sub>10</sub> FEM-<br>HW | 3.74                                                     | 0.581                                                          | 0.939                                             | 0.0148                                        | 0.865          | 0.865                   | 12.0                                 |

Considering the RH:

|                                | Intercept<br>Coefficient<br>( $\mu\text{g}/\text{m}^3$ ) | Intercept<br>Standard<br>Error<br>( $\mu\text{g}/\text{m}^3$ ) | RH %<br>MLR<br>Coefficient | RH %<br>Standard<br>Error | PM <sub>10</sub> OPC-<br>HW<br>MLR<br>Coefficient | PM <sub>10</sub> OPC-HW<br>Standard<br>Error | R <sup>2</sup> | Adjusted<br>R <sup>2</sup> | RMSE<br>( $\mu\text{g}/\text{m}^3$ ) |
|--------------------------------|----------------------------------------------------------|----------------------------------------------------------------|----------------------------|---------------------------|---------------------------------------------------|----------------------------------------------|----------------|----------------------------|--------------------------------------|
| PM <sub>10</sub><br>FEM-<br>HW | 9.65                                                     | 1.11                                                           | -0.153                     | 0.0247                    | 0.928                                             | 0.0145                                       | 0.872          | 0.872                      | 11.7                                 |

The inclusion of RH did not increase the correlation significantly. Therefore, the low-cost sensors measurements were not corrected for the relative humidity.

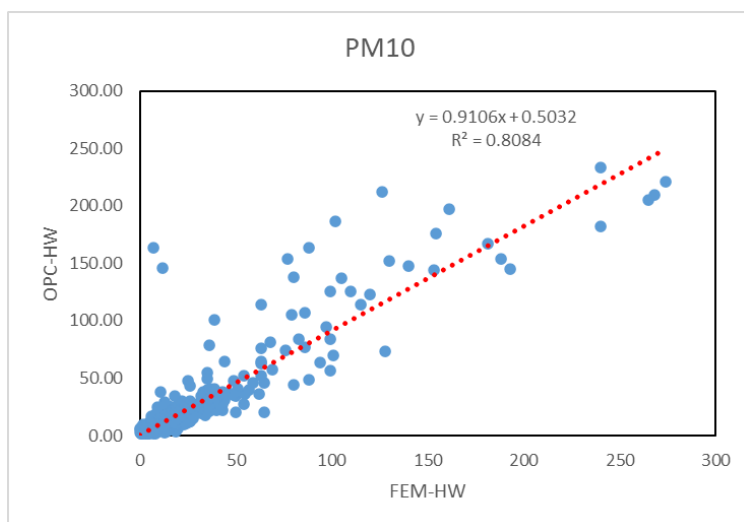

**Fig S1:** Correlation between OPC-N3 and FEM at HW for PM<sub>10</sub>. The plot includes all the measurements including measurements with corresponding high relative humidity (>85%).

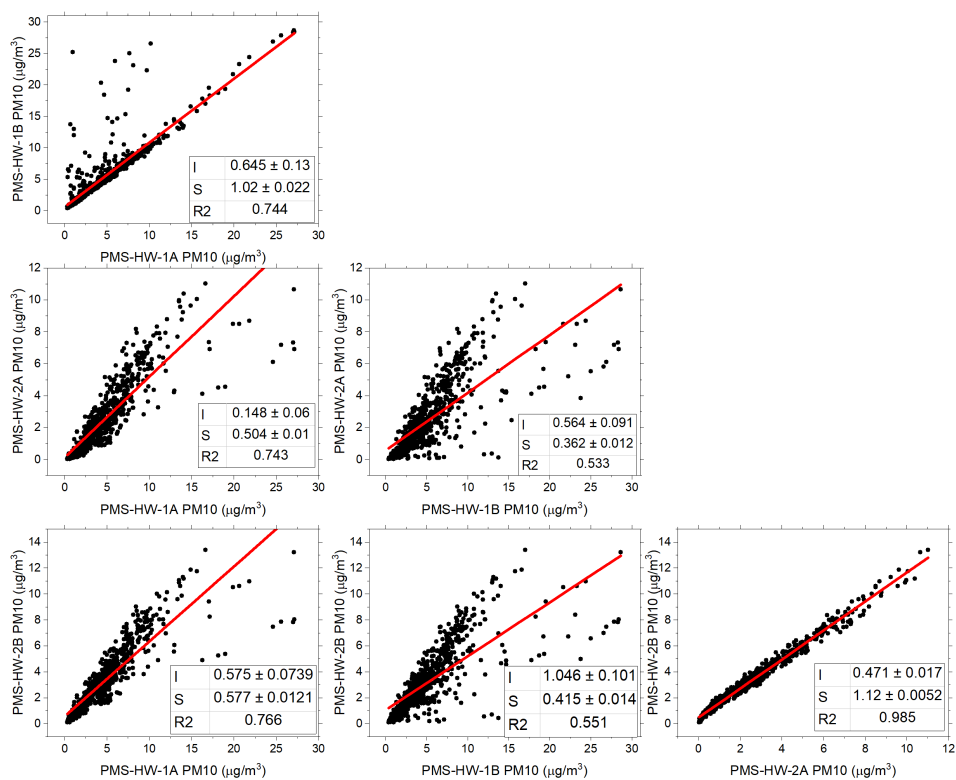

**Figure S2:** Inter-sensor correlation of PMS5003 sensors at HW site for PM<sub>10</sub> concentrations. The plot includes measurements recorded between 04/1/2022 – 04/30/2022. I: intercept; S: slope.

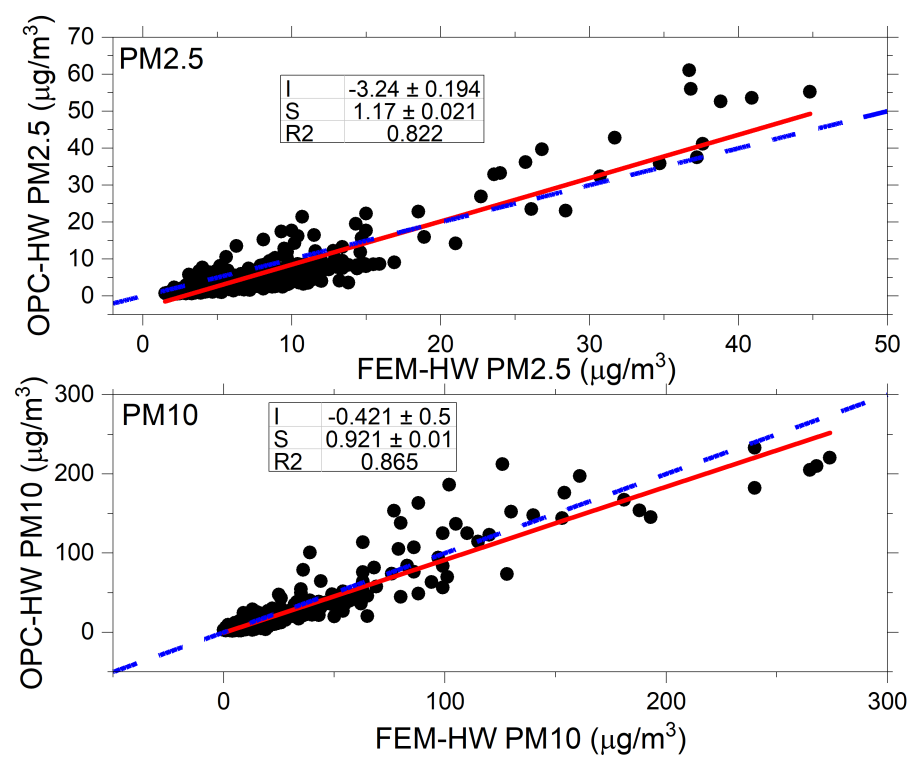

**Figure S3:** PM<sub>2.5</sub> and PM<sub>10</sub> concentrations for OPC-HW and FEM-HW at HW site. The plot includes measurements recorded between 04/1/2022 – 04/30/2022. I: intercept; S: slope.

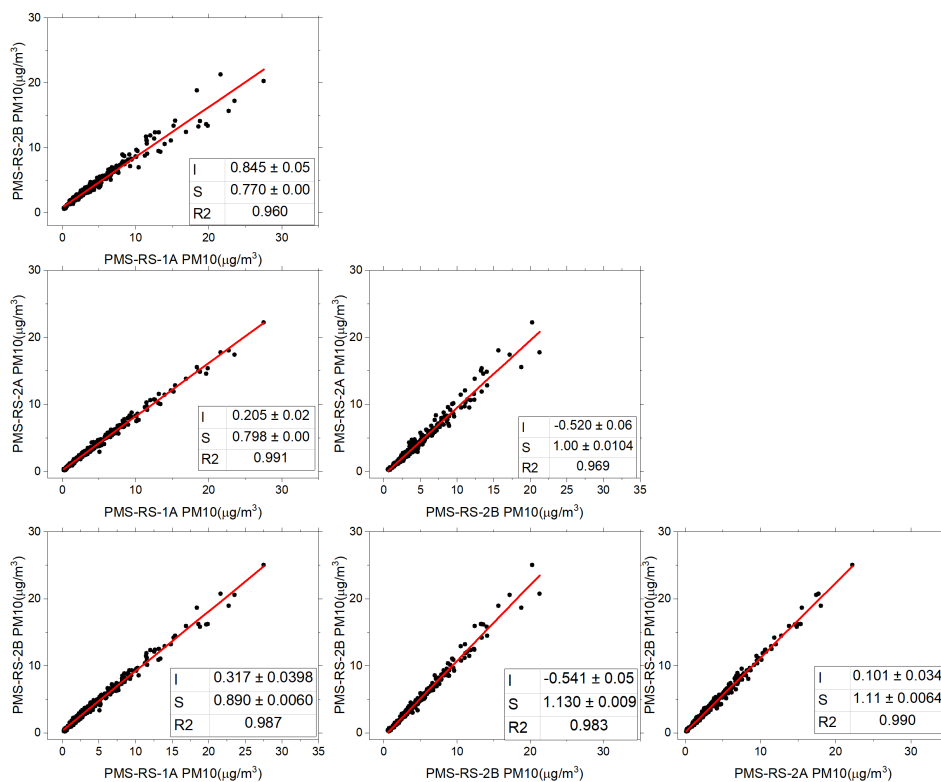

**Figure S4:** Inter-sensor correlation for the PMS5003 sensors at the RS site. The plot includes measurements recorded between 04/18/2022 – 04/30/2022. I: intercept; S: slope.

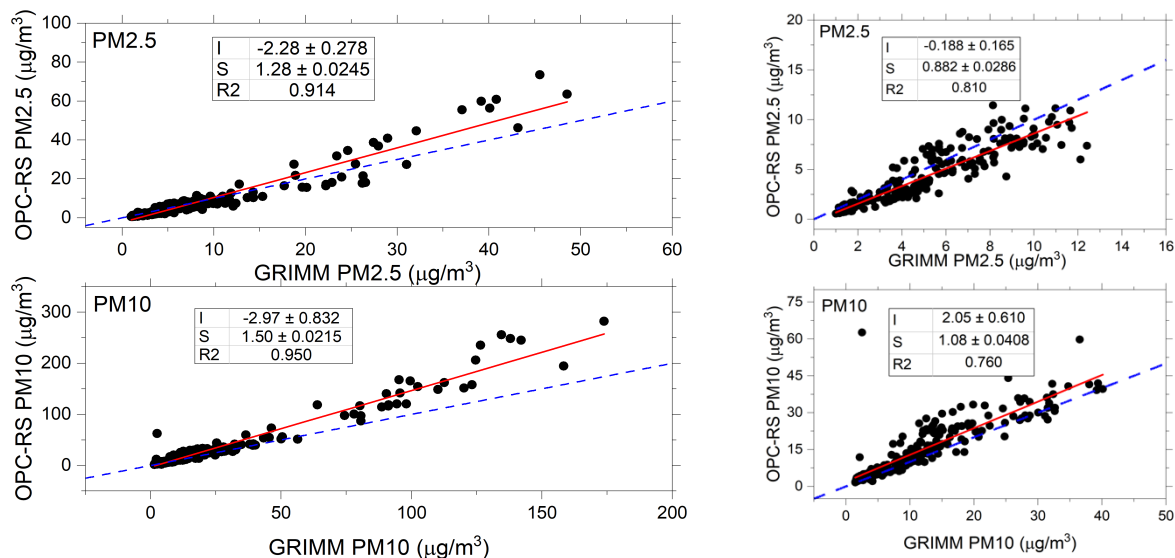

**Figure S5:** PM<sub>2.5</sub> and PM<sub>10</sub> comparison for OPC-RS and GRIMM at RS site (left) using all the measurements between 04/18/2022 – 04/30/2022; (right) removing high concentrations values (PM<sub>10</sub>>50 µg/m<sup>3</sup>) to focus on typical ambient measurements. I: intercept; S: slope.

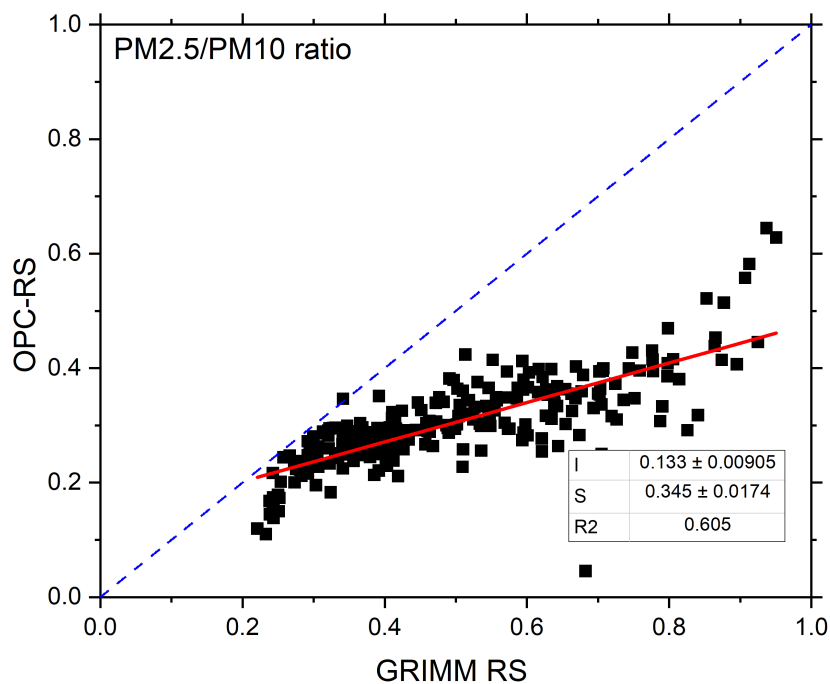

**Figure S6:** PM<sub>2.5</sub>/PM<sub>10</sub> ratio for OPC-RS vs. the PM<sub>2.5</sub>/PM<sub>10</sub> ratio GRIMM-RS. The plot includes measurements recorded between 04/18/2022 – 04/30/2022.

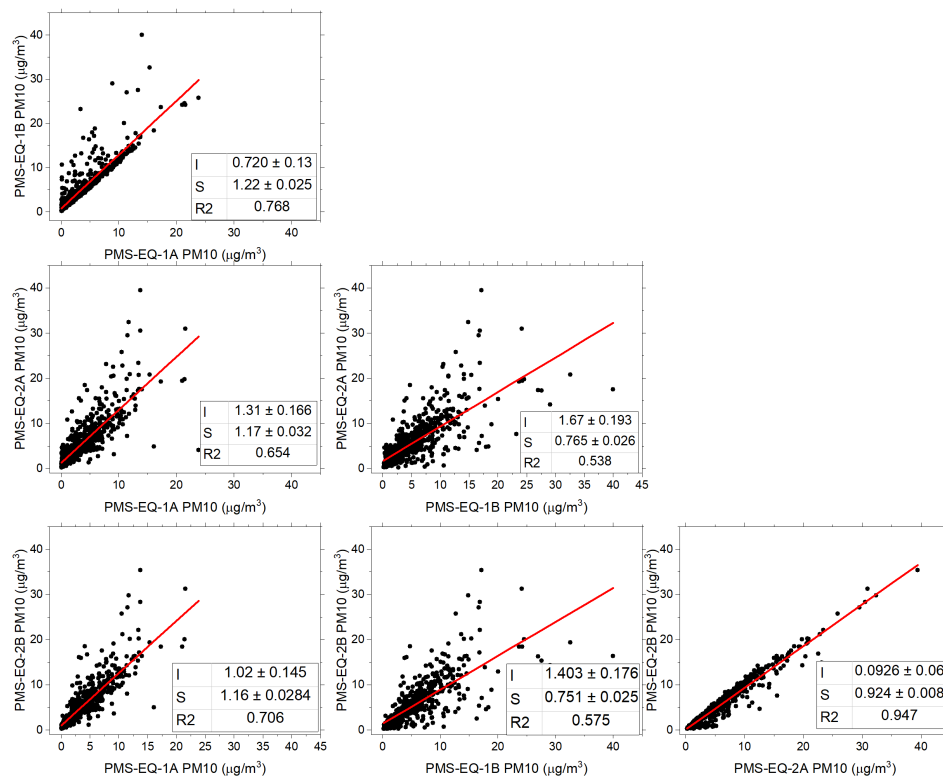

**Figure S7:** Inter-sensor correlation for the PMS5003 sensors at EQ. The plot includes measurements recorded between 04/1/2022 – 04/30/2022.

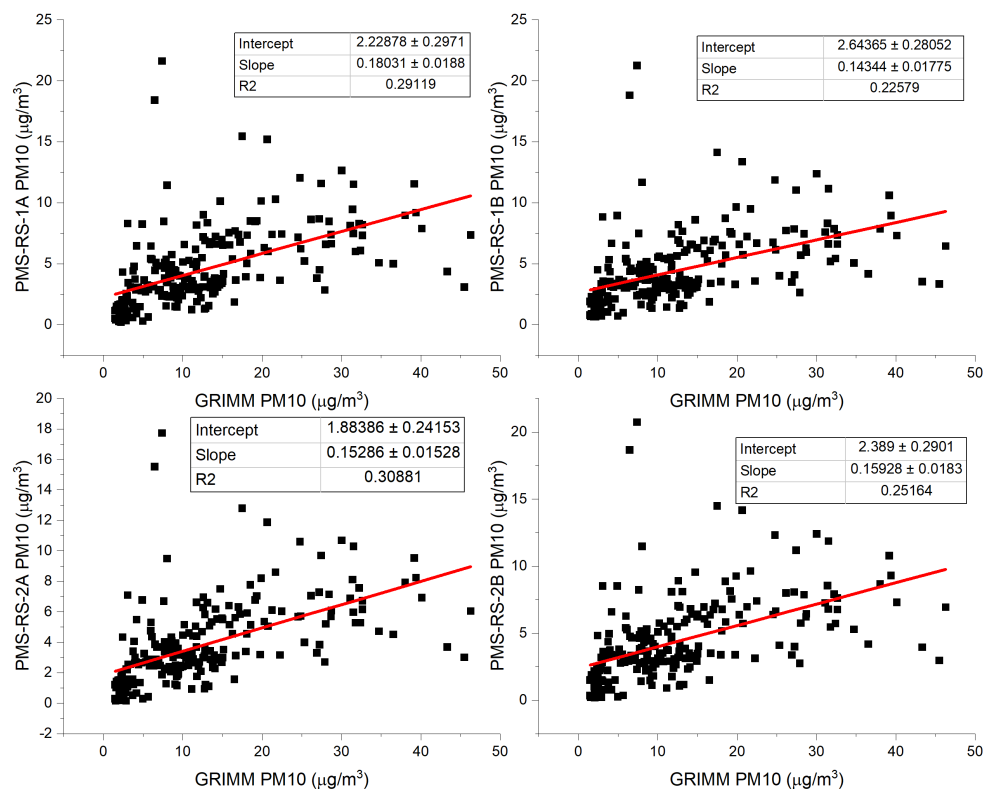

**Figure S8:** PM<sub>10</sub> concentrations for PM<sub>10</sub> < 50 μg/m<sup>3</sup>: Uncorrected PMS sensors vs. GRIMM at RS site.

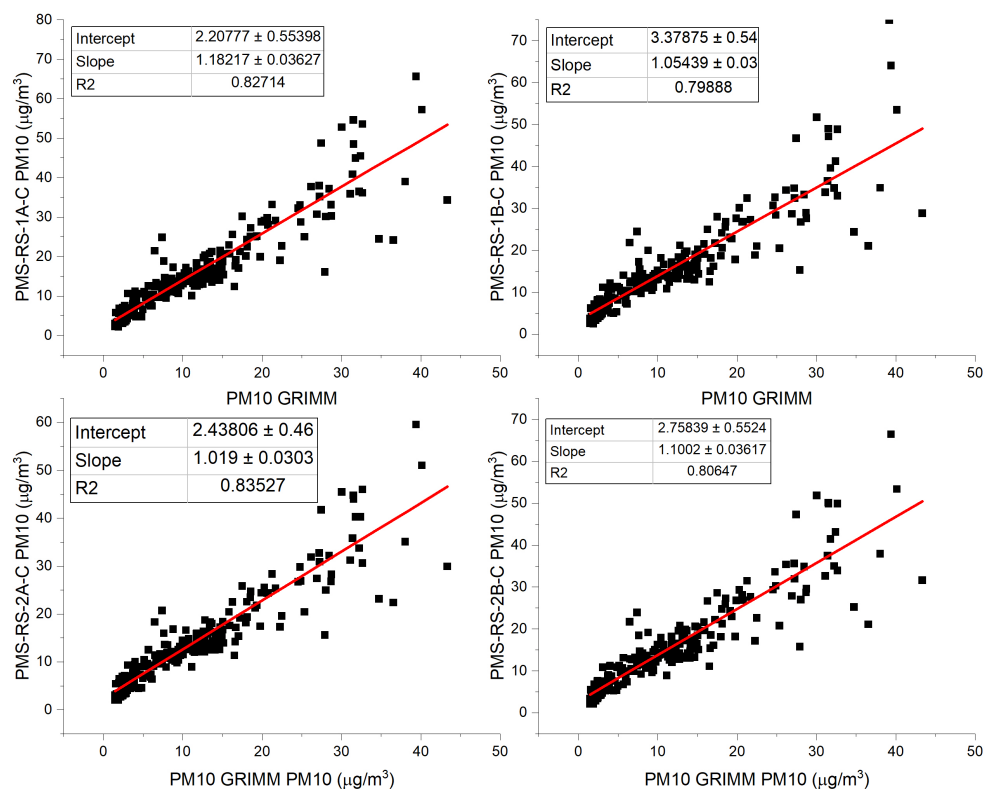

**Figure S9:** PM<sub>10</sub> concentrations for PM<sub>10</sub> < 50 µg/m<sup>3</sup> at RS. Corrected PMS sensors using GRIMM PM ratio vs GRIMM at RS site.



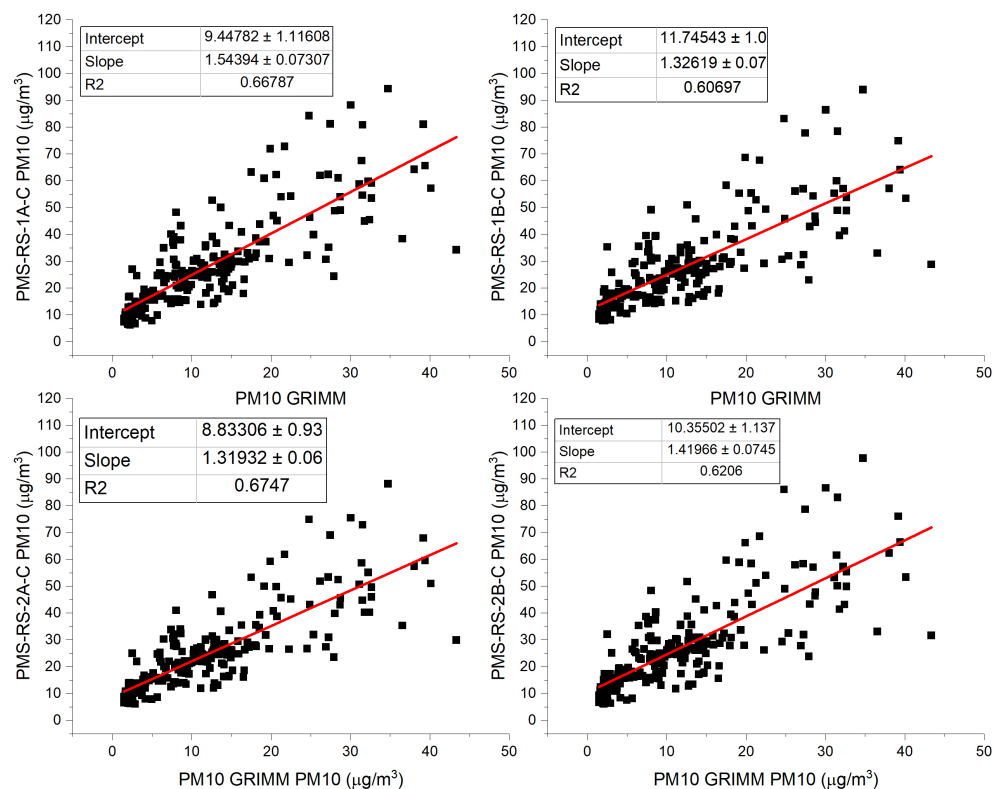

**Figure S10:** PM<sub>10</sub> concentrations for PM<sub>10</sub> < 50 μg/m<sup>3</sup>: Corrected PMS sensors using OPC-RS PM ratio vs. GRIMM at RS site.

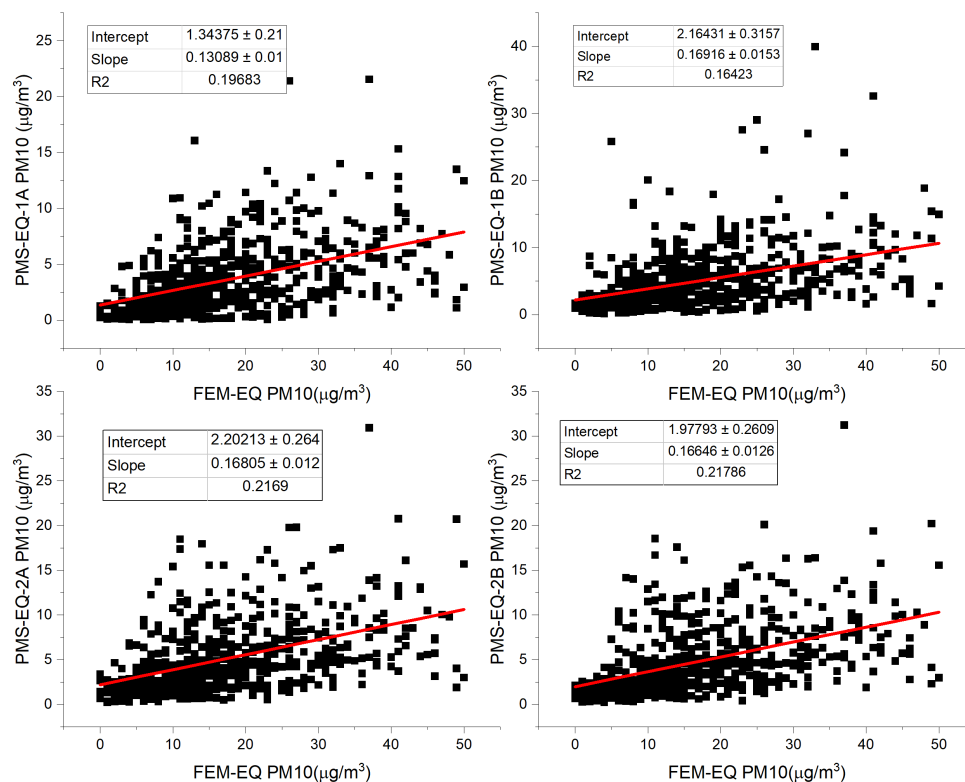

**Figure S11:** PM<sub>10</sub> concentrations for PM<sub>10</sub> < 50 µg/m<sup>3</sup>: Uncorrected PMS sensors vs FEM-EQ PM<sub>10</sub>.

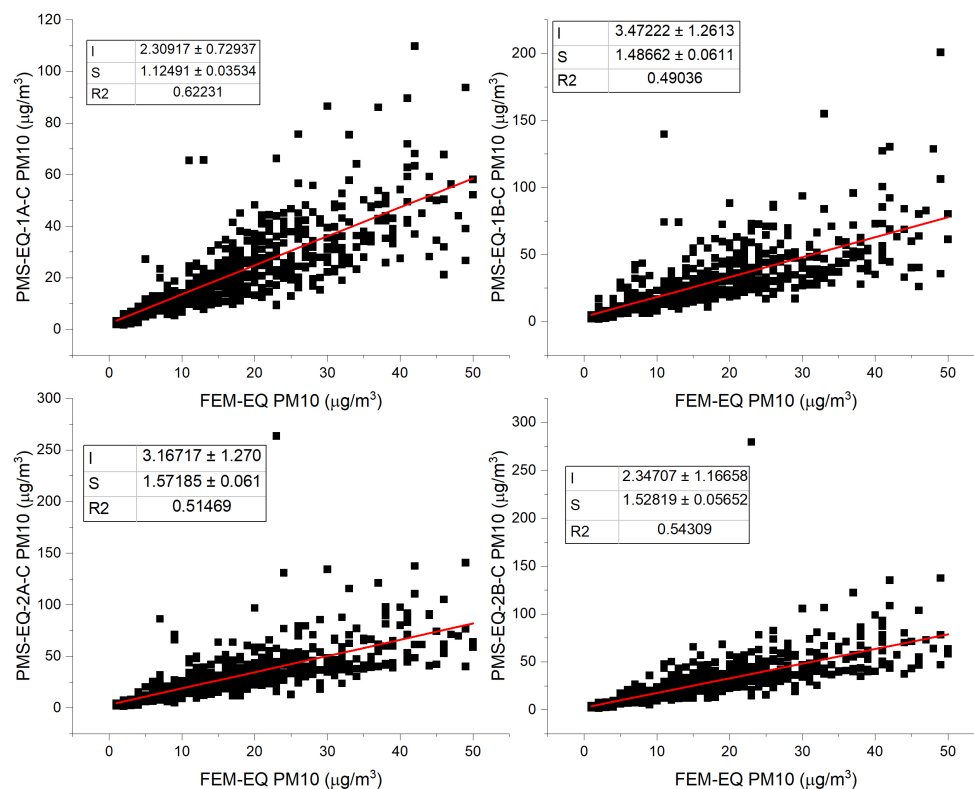

**Figure S12:** PM<sub>10</sub> concentrations for PM<sub>10</sub> < 50 µg/m<sup>3</sup>: Corrected PMS sensors vs FEM-EQ PM<sub>10</sub>.

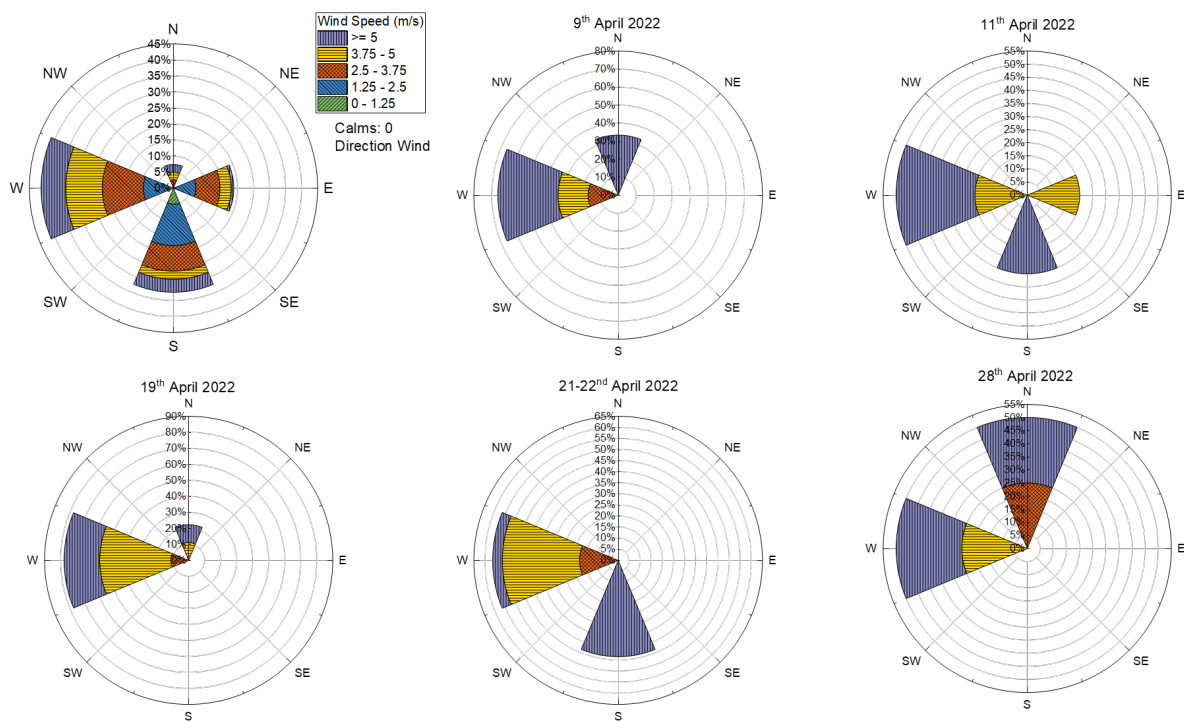

**Figure S13:** Wind roses at EQ monitoring station for April 2022 and individual dust events.

**Table S1:** Meteorological and PM characteristics during the dust events at the EQ monitoring site. The number in the parenthesis represents the minimum and maximum of the parameter.

| Start           | Duration<br>(hrs) | Wind Speed<br>(m/s)  | Relative<br>humidity<br>% | Temperature<br>(°C) | PM <sub>2.5</sub> /PM <sub>10</sub> | PM <sub>10</sub><br>(µg/m <sup>3</sup> ) |
|-----------------|-------------------|----------------------|---------------------------|---------------------|-------------------------------------|------------------------------------------|
| 4/9/22 5:00 AM  | 6                 | 4.97<br>[3.23, 6.27] | 40<br>[24,47]             | 10.2<br>[7.8,16.1]  | 0.12<br>[0.083,0.187]               | 83.3<br>[40,133]                         |
| 4/11/22 9:00 AM | 10                | 5.96<br>[3.75,8.79]  | 23.5<br>[13,43]           | 11.3<br>[6.1,15]    | 0.1<br>[0.04,0.173]                 | 119.3<br>[49,302]                        |
| 4/19/22 9:00 AM | 9                 | 5.51<br>[2.57,9.1]   | 25.4<br>[18,33]           | 16.2<br>[13.9,17.8] | 0.24<br>[0.105,0.42]                | 101.33<br>[50,152]                       |
| 4/21/22 9:00 AM | 23                | 5.82<br>[2.88,9.67]  | 35.22<br>[11,69]          | 15.9<br>[7.2,23.9]  | 0.14<br>[0.059,0.25]                | 163.1<br>[45,327]                        |
| 4/28/22 9:00 PM | 4                 | 5.96<br>[2.93, 9.61] | 41.3<br>[32,49]           | 14<br>[11.1,17.2]   | 0.15<br>[0.046,0.254]               | 138.75<br>[37,239]                       |

### Section S2: Correcting OPC-N3 data at HW using the correlation between the OPC-N3 and the FEM-HW

Using the linear correlation obtained from the OPC-HW vs. FEM-HW (Figure S14 left), the OPC-N3 data was corrected to check for any improvement in the RMSE. The RMSE increased slightly to 12.9 from 12.4  $\mu\text{g}/\text{m}^3$  after correction. The slope improved from 0.92 to 0.99, but the  $R^2$  remained constant.

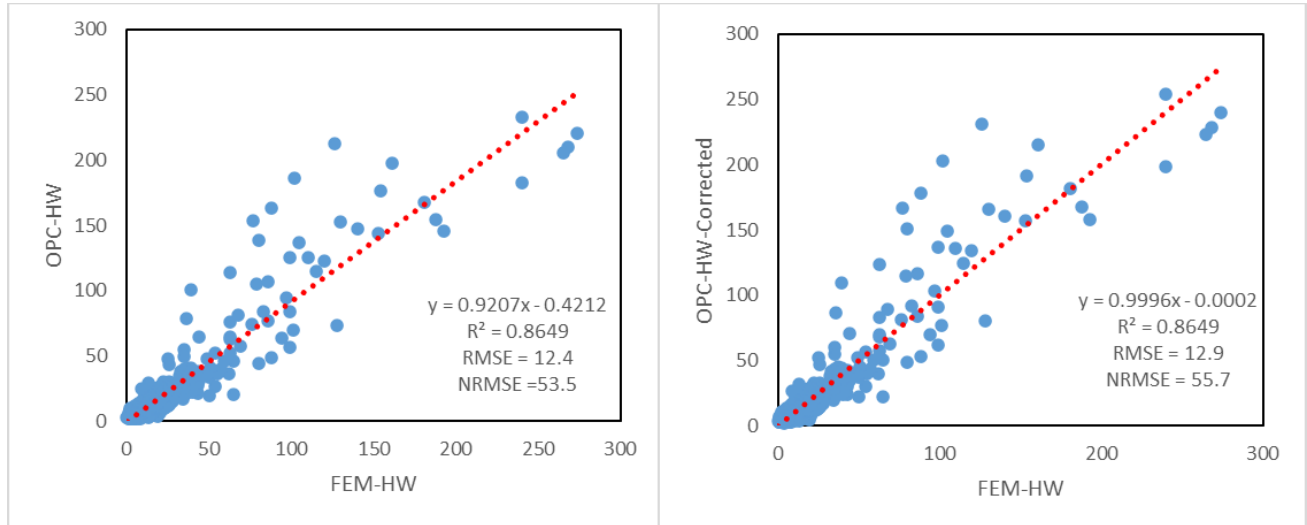

**Figure S14:** OPC-N3 vs BAM at HW: (left) OPC-HW vs FEM-HW; (right) Corrected OPC-HW vs FEM-HW.

### Section S3: Housing for the OPC-N3

A custom housing was built for OPC-N3 to protect the sensor from rain (Fig.S15). The housing includes: 1) opening for sensor inlet; 2) a small hood to protect from rain; 3) opening for air circulation; 4) opening for the wiring. The sensor bottom has drainage port (not visible in the Fig. S15), in case water entered from the opening at the back of the housing.

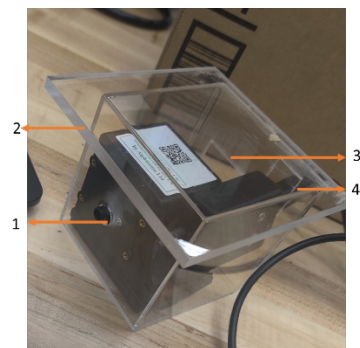

**Figure S15:** Housing for the OPC-N3. The number 1, 2, 3, and 4 represent opening for the inlet, hood for the sensor, opening for air circulation, and opening for the wiring, respectively.
